# Supplementary material for: Dietary Fat Intake: Associations with Dietary Patterns and Postmenopausal Breast Cancer—A Case-Control Study
Source: Cancers (Basel). 2022 Mar 28;14(7):1724. doi: 10.3390/cancers14071724 (PMC8997044; doi:10.3390/cancers14071724)
Supplement: Supplementary file 1 [file cancers-14-01724-s001.zip › cancers-1630961-supp-final.pdf]

## Supplementary Materials

# Dietary Fat Intake: Associations with Dietary Patterns and Postmenopausal Breast Cancer—A Case-Control Study

Beata Stasiewicz, Lidia Wadolowska, Maciej Biernacki, Malgorzata A. Slowinska and Ewa Stachowska

**Table S1.** Factor loadings for food groups in PCA-derived dietary patterns and the Pearson's correlation coefficients for 'Polish-aMED' score among peri- and post-menopausal women ( $n = 420$ ).

| Food Groups                                   | PCA-Derived Dietary Patterns |             |                                 | 'Polish-aMED' Score |
|-----------------------------------------------|------------------------------|-------------|---------------------------------|---------------------|
|                                               | 'Non-Healthy'                | 'Prudent'   | 'Margarine and Sweetened Dairy' |                     |
| Refined cereals                               | <b>0.67</b>                  | -0.25       | 0.12                            | -0.41 *             |
| Red and processed meats                       | <b>0.63</b>                  | 0.06        | 0.07                            | <b>-0.34 *</b>      |
| Sugar, honey and sweets                       | <b>0.57</b>                  | 0.13        | 0.04                            | -0.14 *             |
| Potatoes                                      | <b>0.55</b>                  | -0.04       | -0.02                           | -0.20 *             |
| Animal fats                                   | <b>0.49</b>                  | 0.12        | <b>-0.66</b>                    | -0.31 *             |
| Vegetable oils (including olive oil)          | <b>0.34</b>                  | <b>0.36</b> | 0.02                            | 0.14 *              |
| Sweetened beverages and energy drinks         | <b>0.32</b>                  | 0.13        | 0.18                            | 0.01                |
| Fruit                                         | -0.06                        | <b>0.55</b> | -0.05                           | <b>0.38 *</b>       |
| Fish                                          | -0.07                        | <b>0.49</b> | 0.09                            | <b>0.33 *</b>       |
| Legumes                                       | 0.00                         | <b>0.48</b> | 0.19                            | <b>0.36 *</b>       |
| Milk, fermented milk drinks and cheese curd   | -0.05                        | <b>0.48</b> | 0.13                            | 0.22 *              |
| Wholemeal cereals                             | <b>-0.45</b>                 | <b>0.47</b> | -0.01                           | <b>0.43 *</b>       |
| Fruit, vegetable, vegetable-fruit juices      | 0.16                         | <b>0.45</b> | 0.00                            | 0.11 *              |
| Eggs                                          | 0.20                         | <b>0.44</b> | -0.10                           | 0.10 *              |
| Vegetables                                    | 0.00                         | <b>0.42</b> | -0.17                           | <b>0.34 *</b>       |
| Nuts and seeds                                | <b>-0.39</b>                 | <b>0.42</b> | -0.12                           | <b>0.46 *</b>       |
| Breakfast cereals                             | 0.04                         | <b>0.35</b> | <b>0.31</b>                     | 0.14 *              |
| Cheese                                        | 0.23                         | <b>0.34</b> | 0.10                            | 0.02                |
| Other fats (margarine, mayonnaise, dressings) | 0.17                         | -0.12       | <b>0.80</b>                     | -0.05               |
| Sweetened milk beverages and flavoured cheese | 0.29                         | 0.28        | <b>0.36</b>                     | -0.06               |
| White meat                                    | 0.22                         | 0.08        | <b>0.31</b>                     | -0.03               |
| Ratio of vegetable oils to animal fat         | NA                           | NA          | NA                              | <b>0.38 *</b>       |
| Share in explaining the variance (%)          | 13                           | 12          | 7                               | NA                  |

'Polish-aMED'—'Polish-adapted Mediterranean Diet' (range of points: 0–8); PCA—Principal Component Analysis; NA— not applied; bolded values are marked for the main components of PCA-derived dietary patterns with absolute loadings  $\geq 0.3$  and for eight components of the 'Polish-aMED' score; \* $p < 0.05$ , test of significance for Pearson's correlation coefficients. In identifying the number of PCA-derived DPs, three criteria were considered: (i) the eigenvalues from the correlation matrix of the standardized variables  $> 1.0$ , (ii) the break point identified in the plot of eigenvalues, and (iii) the total variance explained.

**Table S2.** The mean (95% CI) of food consumption and fat intake by dietary patterns among peri- and post-menopausal women ( $n = 420$ ).

| Food groups                                       | Total             | Dietary Patterns       |                   |                   |                    |                   |                   |                                          |                   |                   |                      |                   |
|---------------------------------------------------|-------------------|------------------------|-------------------|-------------------|--------------------|-------------------|-------------------|------------------------------------------|-------------------|-------------------|----------------------|-------------------|
|                                                   |                   | 'Non-Healthy' tertiles |                   |                   | 'Prudent' tertiles |                   |                   | 'Margarine and Sweetened Dairy' tertiles |                   |                   | 'Polish-aMED' levels |                   |
|                                                   |                   | bottom                 | middle            | upper             | bottom             | middle            | upper             | bottom                                   | middle            | upper             | lower                | higher            |
| Sample size ( $n$ )                               | 420               | 139                    | 141               | 140               | 139                | 140               | 141               | 140                                      | 139               | 141               | 189                  | 231               |
| <b>Frequency of food consumption (times/day)*</b> |                   |                        |                   |                   |                    |                   |                   |                                          |                   |                   |                      |                   |
| Sugar, honey and sweets                           | 1.9<br>(1.7; 2.0) | 1.2<br>(1.0; 1.3)      | 1.7<br>(1.5; 1.8) | 2.8<br>(2.6; 3.0) | 1.7<br>(1.5; 1.9)  | 1.9<br>(1.7; 2.1) | 2.1<br>(1.8; 2.3) | 2.0<br>(1.7; 2.2)                        | 1.7<br>(1.5; 1.9) | 2.0<br>(1.8; 2.2) | 2.0<br>(1.8, 2.2)    | 1.8<br>(1.6, 1.9) |
| Red and processed meats                           | 1.4<br>(1.3; 1.4) | 0.8<br>(0.7; 0.9)      | 1.4<br>(1.3; 1.5) | 1.9<br>(1.8; 2.0) | 1.3<br>(1.2; 1.4)  | 1.3<br>(1.2; 1.5) | 1.5<br>(1.3; 1.6) | 1.4<br>(1.3; 1.5)                        | 1.3<br>(1.1; 1.4) | 1.4<br>(1.3; 1.5) | 1.6<br>(1.5, 1.7)    | 1.2<br>(1.1, 1.3) |
| Animal fats                                       | 1.1<br>(1.1; 1.2) | 0.7<br>(0.6; 0.8)      | 1.1<br>(1.0; 1.2) | 1.6<br>(1.5; 1.8) | 1.0<br>(0.9; 1.1)  | 1.2<br>(1.1; 1.4) | 1.2<br>(1.1; 1.4) | 1.9<br>(1.7; 2.0)                        | 1.0<br>(0.9; 1.2) | 0.5<br>(0.5; 0.6) | 1.4<br>(1.3, 1.5)    | 0.9<br>(0.8, 1.0) |
| Milk, fermented milk drinks and cheese curd       | 1.1<br>(1.0; 1.1) | 1.2<br>(1.0; 1.3)      | 1.0<br>(0.9; 1.1) | 1.1<br>(1.0; 1.2) | 0.7<br>(0.6; 0.8)  | 1.1<br>(1.0; 1.2) | 1.4<br>(1.3; 1.6) | 0.9<br>(0.8; 1.0)                        | 1.2<br>(1.1; 1.3) | 1.1<br>(1.0; 1.2) | 1.0<br>(0.9, 1.1)    | 1.2<br>(1.1, 1.2) |
| Refined cereals                                   | 0.9<br>(0.9; 1.0) | 0.4<br>(0.3; 0.4)      | 0.9<br>(0.8; 1.0) | 1.5<br>(1.4; 1.6) | 1.2<br>(1.1; 1.3)  | 0.8<br>(0.7; 0.9) | 0.8<br>(0.7; 0.9) | 0.9<br>(0.8; 1.1)                        | 0.8<br>(0.7; 0.9) | 1.1<br>(1.0; 1.2) | 1.2<br>(1.1, 1.3)    | 0.7<br>(0.6, 0.8) |
| Vegetables                                        | 1.2<br>(1.2; 1.3) | 1.2<br>(1.1; 1.3)      | 1.2<br>(1.2; 1.3) | 1.2<br>(1.1; 1.3) | 1.0<br>(0.9; 1.1)  | 1.2<br>(1.1; 1.3) | 1.5<br>(1.4; 1.6) | 1.3<br>(1.3; 1.4)                        | 1.2<br>(1.1; 1.3) | 1.1<br>(1.0; 1.2) | 1.1<br>(1.0, 1.1)    | 1.4<br>(1.3, 1.4) |
| Fruit                                             | 1.0<br>(0.9; 1.0) | 1.0<br>(0.9; 1.1)      | 1.0<br>(0.9; 1.0) | 0.9<br>(0.8; 1.0) | 0.7<br>(0.6; 0.8)  | 0.9<br>(0.9; 1.0) | 1.3<br>(1.2; 1.3) | 1.0<br>(0.9; 1.1)                        | 1.0<br>(0.9; 1.1) | 1.0<br>(0.9; 1.0) | 0.8<br>(0.7, 0.8)    | 1.1<br>(1.1, 1.2) |
| Wholemeal cereals                                 | 0.9<br>(0.8; 1.0) | 1.3<br>(1.2; 1.4)      | 0.9<br>(0.7; 1.0) | 0.5<br>(0.4; 0.6) | 0.5<br>(0.4; 0.6)  | 0.9<br>(0.8; 1.0) | 1.3<br>(1.1; 1.4) | 0.9<br>(0.8; 1.0)                        | 1.0<br>(0.8; 1.1) | 0.8<br>(0.7; 0.9) | 0.6<br>(0.5, 0.7)    | 1.1<br>(1.0, 1.2) |
| Potatoes                                          | 0.6<br>(0.6; 0.7) | 0.4<br>(0.3; 0.4)      | 0.7<br>(0.6; 0.7) | 0.8<br>(0.8; 0.8) | 0.7<br>(0.6; 0.7)  | 0.6<br>(0.5; 0.6) | 0.6<br>(0.6; 0.7) | 0.7<br>(0.6; 0.7)                        | 0.6<br>(0.5; 0.6) | 0.6<br>(0.6; 0.7) | 0.7<br>(0.6, 0.7)    | 0.6<br>(0.5, 0.6) |
| Vegetable oils                                    | 0.6<br>(0.6; 0.6) | 0.5<br>(0.5; 0.6)      | 0.6<br>(0.6; 0.7) | 0.7<br>(0.7; 0.8) | 0.5<br>(0.4; 0.5)  | 0.7<br>(0.6; 0.7) | 0.7<br>(0.7; 0.8) | 0.6<br>(0.6; 0.7)                        | 0.6<br>(0.5; 0.6) | 0.6<br>(0.6; 0.7) | 0.6<br>(0.5, 0.6)    | 0.7<br>(0.6, 0.7) |
| Other fats                                        | 0.5<br>(0.4; 0.5) | 0.3<br>(0.2; 0.4)      | 0.5<br>(0.4; 0.6) | 0.6<br>(0.5; 0.7) | 0.6<br>(0.5; 0.7)  | 0.3<br>(0.2; 0.4) | 0.5<br>(0.4; 0.6) | 0.1<br>(0.1; 0.1)                        | 0.2<br>(0.1; 0.2) | 1.1<br>(1.0; 1.2) | 0.5<br>(0.4, 0.6)    | 0.4<br>(0.4, 0.5) |
| Cheese                                            | 0.4<br>(0.3; 0.4) | 0.3<br>(0.3; 0.4)      | 0.4<br>(0.3; 0.4) | 0.4<br>(0.4; 0.5) | 0.3<br>(0.2; 0.3)  | 0.3<br>(0.3; 0.4) | 0.5<br>(0.4; 0.5) | 0.4<br>(0.3; 0.4)                        | 0.3<br>(0.3; 0.4) | 0.4<br>(0.4; 0.5) | 0.4<br>(0.3, 0.4)    | 0.4<br>(0.3, 0.4) |
| White meat                                        | 0.4<br>(0.4; 0.5) | 0.4<br>(0.3; 0.4)      | 0.5<br>(0.4; 0.5) | 0.5<br>(0.5; 0.5) | 0.4<br>(0.4; 0.5)  | 0.4<br>(0.4; 0.5) | 0.5<br>(0.4; 0.5) | 0.4<br>(0.3; 0.4)                        | 0.5<br>(0.4; 0.5) | 0.5<br>(0.5; 0.6) | 0.4<br>(0.4, 0.5)    | 0.4<br>(0.4, 0.5) |
| Juices                                            | 0.5<br>(0.4; 0.5) | 0.3<br>(0.3; 0.4)      | 0.5<br>(0.4; 0.6) | 0.6<br>(0.5; 0.7) | 0.2<br>(0.2; 0.3)  | 0.4<br>(0.3; 0.5) | 0.8<br>(0.7; 0.9) | 0.5<br>(0.4; 0.6)                        | 0.5<br>(0.4; 0.6) | 0.4<br>(0.4; 0.5) | 0.4<br>(0.3, 0.4)    | 0.6<br>(0.5, 0.7) |
| Eggs                                              | 0.4<br>(0.3; 0.4) | 0.3<br>(0.3; 0.3)      | 0.3<br>(0.3; 0.4) | 0.4<br>(0.4; 0.5) | 0.2<br>(0.2; 0.3)  | 0.3<br>(0.3; 0.4) | 0.5<br>(0.5; 0.6) | 0.4<br>(0.4; 0.5)                        | 0.3<br>(0.3; 0.4) | 0.3<br>(0.3; 0.4) | 0.3<br>(0.3, 0.4)    | 0.4<br>(0.3, 0.4) |

|                                                      |                         |                         |                      |                         |                      |                      |                         |                         |                         |                         |                       |                         |
|------------------------------------------------------|-------------------------|-------------------------|----------------------|-------------------------|----------------------|----------------------|-------------------------|-------------------------|-------------------------|-------------------------|-----------------------|-------------------------|
| Sweetened milk beverages and flavored cheese curds   | 0.3<br>(0.3; 0.4)       | 0.2<br>(0.1; 0.2)       | 0.3<br>(0.2; 0.4)    | 0.5<br>(0.4; 0.6)       | 0.2<br>(0.1; 0.2)    | 0.3<br>(0.2; 0.4)    | 0.5<br>(0.4; 0.6)       | 0.2<br>(0.1; 0.2)       | 0.3<br>(0.2; 0.4)       | 0.5<br>(0.4; 0.6)       | 0.4<br>(0.3, 0.4)     | 0.3<br>(0.2, 0.3)       |
| Fish                                                 | 0.3<br>(0.2; 0.3)       | 0.3<br>(0.2; 0.4)       | 0.3<br>(0.2; 0.3)    | 0.3<br>(0.2; 0.3)       | 0.1<br>(0.1; 0.2)    | 0.2<br>(0.2; 0.3)    | 0.5<br>(0.4; 0.5)       | 0.2<br>(0.2; 0.3)       | 0.3<br>(0.2; 0.3)       | 0.3<br>(0.2; 0.3)       | 0.2<br>(0.2, 0.2)     | 0.3<br>(0.3, 0.4)       |
| Nuts and seeds                                       | 0.3<br>(0.3; 0.4)       | 0.5<br>(0.4; 0.6)       | 0.3<br>(0.2; 0.3)    | 0.2<br>(0.1; 0.2)       | 0.1<br>(0.1; 0.2)    | 0.3<br>(0.2; 0.4)    | 0.6<br>(0.5; 0.7)       | 0.4<br>(0.3; 0.5)       | 0.4<br>(0.3; 0.5)       | 0.3<br>(0.2; 0.3)       | 0.1<br>(0.1, 0.1)     | 0.5<br>(0.4, 0.6)       |
| Legumes                                              | 0.2<br>(0.2; 0.2)       | 0.2<br>(0.2; 0.3)       | 0.2<br>(0.2; 0.2)    | 0.2<br>(0.2; 0.3)       | 0.1<br>(0.1; 0.1)    | 0.2<br>(0.1; 0.2)    | 0.4<br>(0.3; 0.4)       | 0.2<br>(0.1; 0.2)       | 0.2<br>(0.2; 0.3)       | 0.3<br>(0.2; 0.3)       | 0.1<br>(0.1, 0.1)     | 0.3<br>(0.3, 0.3)       |
| Breakfast cereals                                    | 0.2<br>(0.1; 0.2)       | 0.1<br>(0.1; 0.2)       | 0.2<br>(0.1; 0.2)    | 0.2<br>(0.1; 0.2)       | 0.0<br>(0.0; 0.1)    | 0.2<br>(0.1; 0.2)    | 0.3<br>(0.2; 0.3)       | 0.1<br>(0.0; 0.1)       | 0.2<br>(0.1; 0.2)       | 0.3<br>(0.2; 0.3)       | 0.1<br>(0.1, 0.2)     | 0.2<br>(0.2, 0.2)       |
| Sweetened beverages and energy drinks                | 0.1<br>(0.0; 0.1)       | 0.0<br>(0.0; 0.0)       | 0.0<br>(0.0; 0.0)    | 0.1<br>(0.1; 0.2)       | 0.0<br>(0.0; 0.1)    | 0.0<br>(0.0; 0.1)    | 0.1<br>(0.1; 0.1)       | 0.0<br>(0.0; 0.1)       | 0.0<br>(0.0; 0.1)       | 0.1<br>(0.1; 0.1)       | 0.0<br>(0.0, 0.1)     | 0.1<br>(0.0, 0.1)       |
| <b>Food consumption (g)<sup>s</sup></b>              |                         |                         |                      |                         |                      |                      |                         |                         |                         |                         |                       |                         |
| Cold cereal                                          | 7.8<br>(6.6, 9.1)       | 10.0<br>(7.5, 12.6)     | 7.8<br>(5.6, 9.9)    | 5.7<br>(3.9, 7.4)       | 3.3<br>(1.9, 4.7)    | 8.4<br>(6.1, 10.7)   | 11.8<br>(9.3, 14.2)     | 4.3<br>(2.7, 5.9)       | 8.3<br>(6.1, 10.5)      | 10.8<br>(8.3, 13.3)     | 5.0<br>(3.5, 6.4)     | 10.1<br>(8.3, 12.0)     |
| Skim milk, on cereal or to drink                     | 10.9<br>(7.0, 14.7)     | 18.0<br>(9.9, 26.1)     | 8.4<br>(0.9, 15.9)   | 6.3<br>(3.0, 9.7)       | 4.8<br>(2.2, 11.8)   | 6.7<br>(3.3, 10.1)   | 21.0<br>(12.7, 29.3)    | 4.9<br>(1.5, 8.2)       | 11.0<br>(5.0, 16.9)     | 16.8<br>(7.5, 26.0)     | 5.8<br>(0.4, 11.2)    | 15.0<br>(9.7, 20.4)     |
| Orange juice or grapefruit juice                     | 61.6<br>(53.2, 69.9)    | 41.9<br>(30.4, 53.3)    | 57.7<br>(43.9, 71.6) | 85.1<br>(68.1, 102.1)   | 32.6<br>(22.8, 42.5) | 54.5<br>(41.2, 67.7) | 97.2<br>(79.8, 114.6)   | 64.1<br>(49.0, 79.1)    | 63.8<br>(50.1, 77.5)    | 56.9<br>(42.0, 71.9)    | 49.6<br>(39.0, 60.2)  | 71.4<br>(59.0, 83.8)    |
| Fruit (not juices)                                   | 116.2<br>(110.6, 121.7) | 121.1<br>(112.3, 129.8) | 114.7 (104.9, 124.5) | 112.8<br>(102.4, 123.2) | 85.8<br>(79.0, 92.5) | 113.7 (105.4, 122.1) | 148.6<br>(138.1, 159.1) | 117.1<br>(107.1, 127.1) | 118.2<br>(108.9, 127.6) | 113.2<br>(103.5, 122.8) | 95.5<br>(87.9, 103.1) | 133.1<br>(125.8, 140.4) |
| Eggs, fried or scrambled in margarine, butter or oil | 15.7<br>(14.2, 17.1)    | 13.4<br>(11.2, 15.6)    | 14.9<br>(12.3, 17.5) | 18.6<br>(16.0, 21.3)    | 8.8<br>(7.2, 10.3)   | 15.4<br>(12.8, 18.0) | 22.7<br>(20.0, 25.4)    | 19.0<br>(16.0, 21.9)    | 13.2<br>(11.1, 15.3)    | 14.8<br>(12.4, 17.1)    | 13.4<br>(11.6, 15.2)  | 17.5<br>(15.3, 19.6)    |
| Sausage or bacon, regular-fat                        | 5.3<br>(4.6, 6.0)       | 2.0<br>(1.4, 2.6)       | 5.0<br>(4.0, 5.9)    | 8.8<br>(7.3, 10.3)      | 5.8<br>(4.5, 7.1)    | 5.2<br>(4.2, 6.3)    | 4.8<br>(3.7, 6.0)       | 5.7<br>(4.4, 7.1)       | 5.2<br>(3.9, 6.4)       | 4.9<br>(4.0, 5.9)       | 7.3<br>(6.1, 8.5)     | 3.7<br>(3.0, 4.3)       |
| Beef or pork hot dogs, regular fat                   | 0.8<br>(0.5, 1.1)       | 0.3<br>(0.1, 0.5)       | 0.7<br>(0.3, 1.1)    | 1.5<br>(0.8, 2.3)       | 0.5<br>(0.1, 0.9)    | 0.7<br>(0.4, 1.0)    | 1.3<br>(0.6, 2.0)       | 0.4<br>(0.2, 0.6)       | 0.6<br>(0.3, 0.8)       | 1.5<br>(0.7, 2.3)       | 0.8<br>(0.4, 1.3)     | 0.8<br>(0.5, 1.2)       |
| Cheese or cheese spread, regular-fat                 | 8.7<br>(8.0, 9.5)       | 8.6<br>(7.2, 10.1)      | 8.5<br>(7.1, 9.9)    | 9.0<br>(7.9, 10.2)      | 6.8<br>(5.5, 8.0)    | 8.2<br>(7.1, 9.3)    | 11.2<br>(9.7, 12.6)     | 7.9<br>(6.7, 9.1)       | 8.7<br>(7.5, 9.9)       | 9.6<br>(8.0, 11.1)      | 8.0<br>(6.9, 9.2)     | 9.3<br>(8.3, 10.3)      |
| French fries, home fries, or hash brown potatoes     | 2.8<br>(2.3, 3.4)       | 1.2<br>(0.9, 1.6)       | 2.8<br>(2.0, 3.6)    | 4.5<br>(3.2, 5.8)       | 2.2<br>(1.6, 2.8)    | 2.6<br>(1.6, 3.5)    | 3.8<br>(2.6, 4.9)       | 2.8<br>(1.7, 3.9)       | 2.5<br>(1.8, 3.3)       | 3.2<br>(2.3, 4.1)       | 3.0<br>(2.2, 3.9)     | 2.7<br>(2.0, 3.4)       |

|                                                       |                      |                      |                       |                         |                       |                      |                      |                       |                      |                      |                       |                      |
|-------------------------------------------------------|----------------------|----------------------|-----------------------|-------------------------|-----------------------|----------------------|----------------------|-----------------------|----------------------|----------------------|-----------------------|----------------------|
| Rice                                                  | 90.0<br>(84.9, 95.0) | 65.3<br>(56.7, 74.0) | 95.4<br>(87.2, 103.6) | 108.9<br>(100.7, 117.1) | 93.7<br>(84.9, 102.6) | 85.7<br>(76.7, 94.7) | 90.5<br>(81.7, 99.2) | 97.3<br>(89.2, 105.5) | 85.4<br>(76.3, 94.5) | 87.1<br>(77.9, 96.3) | 94.8<br>(87.3, 102.2) | 86.0<br>(79.0, 93.0) |
| Mayonnaise, regular-fat                               | 0.6<br>(0.4, 0.7)    | 0.2<br>(0.1, 0.3)    | 0.5<br>(0.3, 0.6)     | 1.0<br>(0.7, 1.2)       | 0.4<br>(0.2, 0.5)     | 0.3<br>(0.3, 0.4)    | 1.0<br>(0.7, 1.3)    | 0.4<br>(0.3, 0.5)     | 0.5<br>(0.4, 0.7)    | 0.7<br>(0.5, 1.0)    | 0.5<br>(0.4, 0.7)     | 0.6<br>(0.4, 0.8)    |
| Salad dressings, regular-fat                          | 1.8<br>(1.3, 2.4)    | 1.4<br>(0.4, 2.5)    | 1.5<br>(0.6, 2.4)     | 2.6<br>(1.5, 3.6)       | 1.2<br>(0.3, 2.1)     | 2.3<br>(1.0, 3.7)    | 2.0<br>(1.4, 2.5)    | 2.2<br>(0.9, 3.5)     | 1.3<br>(0.8, 1.9)    | 2.0<br>(1.1, 3.0)    | 1.9<br>(1.0, 2.9)     | 1.8<br>(1.1, 2.4)    |
| Margarine or butter on bread, rolls, pancakes         | 6.4<br>(6.0, 6.8)    | 4.1<br>(3.5, 4.6)    | 6.7<br>(6.2, 7.3)     | 8.3<br>(7.6, 9.0)       | 6.8<br>(6.1, 7.4)     | 6.0<br>(5.3, 6.6)    | 6.4<br>(5.7, 7.1)    | 7.6<br>(7.0, 8.3)     | 4.6<br>(4.0, 5.3)    | 6.8<br>(6.2, 7.5)    | 7.4<br>(6.8, 7.9)     | 5.6<br>(5.1, 6.1)    |
| Margarine or butter on vegetables, including potatoes | 0.4<br>(0.3, 0.5)    | 0.1<br>(0.1, 0.2)    | 0.4<br>(0.2, 0.5)     | 0.6<br>(0.4, 0.8)       | 0.2<br>(0.1, 0.3)     | 0.5<br>(0.3, 0.6)    | 0.5<br>(0.3, 0.7)    | 0.4<br>(0.2, 0.5)     | 0.4<br>(0.2, 0.5)    | 0.4<br>(0.3, 0.6)    | 0.3<br>(0.2, 0.5)     | 0.4<br>(0.3, 0.6)    |
| Margarine, butter, or oil on rice or pasta            | 0.3<br>(0.2, 0.4)    | 0.2<br>(0.0, 0.3)    | 0.2<br>(0.1, 0.3)     | 0.5<br>(0.3, 0.7)       | 0.1<br>(0.0, 0.2)     | 0.4<br>(0.2, 0.6)    | 0.3<br>(0.2, 0.5)    | 0.3<br>(0.1, 0.5)     | 0.3<br>(0.1, 0.4)    | 0.3<br>(0.2, 0.4)    | 0.2<br>(0.1, 0.4)     | 0.3<br>(0.2, 0.4)    |
| Percentage energy from dietary fat <sup>§</sup>       | 31.3<br>(31.0, 31.7) | 29.8<br>(29.4, 30.3) | 31.2<br>(30.7, 31.6)  | 33.0<br>(32.4, 33.6)    | 31.6<br>(31.1, 32.1)  | 31.4<br>(30.9, 32.0) | 31.0<br>(30.4, 31.6) | 32.1<br>(31.6, 32.7)  | 30.6<br>(30.1, 31.1) | 31.3<br>(30.7, 31.9) | 32.4<br>(31.9, 32.9)  | 30.5<br>(30.1, 30.9) |
| Total fat intake (g) <sup>§</sup>                     | 7.1<br>(6.6, 7.5)    | 4.4<br>(3.8, 5.0)    | 7.3<br>(6.7, 7.9)     | 9.5<br>(8.7, 10.2)      | 7.1<br>(6.4, 7.7)     | 6.8<br>(6.2, 7.5)    | 7.3<br>(6.4, 8.1)    | 8.3<br>(7.6, 9.0)     | 5.3<br>(4.6, 6.0)    | 7.6<br>(6.9, 8.2)    | 7.9<br>(7.4, 8.5)     | 6.3<br>(5.8, 6.9)    |
| Regular fat intake (g) <sup>§</sup>                   | 6.2<br>(5.8, 6.6)    | 3.7<br>(3.2, 4.3)    | 6.3<br>(5.7, 6.9)     | 8.6<br>(7.9, 9.3)       | 6.1<br>(5.5, 6.8)     | 6.2<br>(5.5, 6.8)    | 6.3<br>(5.6, 7.1)    | 8.1<br>(7.4, 8.7)     | 4.8<br>(4.1, 5.4)    | 5.8<br>(5.1, 6.4)    | 7.2<br>(6.6, 7.8)     | 5.4<br>(4.9, 6.0)    |

'Polish-aMED' – 'Polish-adapted Mediterranean Diet' (range of points: 0–8), levels (in points): 'lower' (0–4), 'higher' (5–8); \*the frequency consumption was expressed as a times/day after assigning the values for categories of frequency consumption as follows: 'never or almost never' = 0; 'once a month or less' = 0.025; 'several times a month' = 0.1; 'several times a week' = 0.571; 'daily' = 1; 'several times a day' = 2; §the food consumption was expressed in grams, and the total fat intake, regular fat intake, and the percentage energy from fat were calculated according to the Scoring Procedures of the Percentage Energy from Fat Screener (description in the Material and Methods section); 95%CI – 95% confidence interval.

**Table S3.** Description of food groups for the ‘Polish-adapted Mediterranean Diet’ score (0–8 points) calculation – data for the Initial control sample ( $n = 242$ ) [58].

| Food groups/food items                                                                                                                                                                                                                                                                                                                                                                                                                                                                                         | Frequency of consumption<br>(times/day)* |        | Criteria for 1 point                    |
|----------------------------------------------------------------------------------------------------------------------------------------------------------------------------------------------------------------------------------------------------------------------------------------------------------------------------------------------------------------------------------------------------------------------------------------------------------------------------------------------------------------|------------------------------------------|--------|-----------------------------------------|
|                                                                                                                                                                                                                                                                                                                                                                                                                                                                                                                | Mean (95% CI)                            | Median |                                         |
| <b>VEGETABLES:</b> all kinds of vegetables:<br>cruciferous vegetables (cabbages, brussel sprouts, cauliflower, broccoli, kale, etc.), yellow-orange vegetables (carrots, peppers, etc.), leafy green vegetables (spinach, chicory, lettuce, rocket, leek, celery, parsley, etc.), tomatoes, gourds and squashes (fresh cucumber, marrow, courgettes, pumpkins, aubergines, etc.), root vegetables and other (parsnip, beetroots, onion, garlic, celeriac, radishes, turnip, salads and mixed vegetables, etc.) | 1.300 (1.230; 1.371)                     | 1.000  | Greater than median intake (times/day)* |
| <b>FRUIT:</b> all kinds of fruit:<br>stone fruit (apricots, cherries, nectarines, peaches, plums, grapes, etc.), kiwi and citrus fruit (kiwi, oranges, mandarins, grapefruit, lemons, pome-los, etc.), tropical fruits (pineapples, watermelon, melons, fresh dates and figs, etc.), berries (strawberries, raspberries, blackberries, blueberries, red-currants, blackcurrants, etc.), bananas, apples, pears, avocado                                                                                        | 0.989 (0.925; 1.052)                     | 1.000  | Greater than median intake (times/day)* |
| <b>WHOLEMEAL CEREALS:</b> wholemeal wheat or rye bread, seeded loafs, pumpernickel, wholemeal groats, wholemeal rice, wholemeal pasta                                                                                                                                                                                                                                                                                                                                                                          | 0.890 (0.799; 0.981)                     | 0.671  | Greater than median intake (times/day)* |
| <b>FISH:</b> lean fish (ollock, cod, perch, hake, carp to 1 kg, tuna, panga, trout, etc.)<br>oily fish (salmon, sardines, herring, mackerel, eel, large carp, etc.)                                                                                                                                                                                                                                                                                                                                            | 0.293 (0.253; 0.334)                     | 0.200  | Greater than median intake (times/day)* |
| <b>LEGUMES:</b> fresh and tinned legumes (corn, green peas, green beans, etc.), dry and processed pulses beans (fava, broad, French, green), soya, peas, chickpea and processed pulses (baked beans, hummus, other bread spreads)                                                                                                                                                                                                                                                                              | 0.223 (0.187; 0.259)                     | 0.125  | Greater than median intake (times/day)* |
| <b>NUTS and SEEDS:</b> peanuts, hazelnuts, walnuts, almonds, pistachios, cashews, coconuts, chestnuts, etc., pumpkin seeds, sesame seeds, sun-flower seeds, wheat germs, etc.                                                                                                                                                                                                                                                                                                                                  | 0.375 (0.312; 0.438)                     | 0.125  | Greater than median intake (times/day)* |
| <b>RATIO of VEGETABLES OILS</b> (rapeseed oil, sunflower oil, linseed oil, olives) <b>to ANIMAL FAT</b> (butter, cream, lard) instead of <b>RATIO of MONO-UNSATURATED to SATURATED FAT</b>                                                                                                                                                                                                                                                                                                                     | 1.462 (1.125; 1.799)                     | 0.519  | Greater than median intake (times/day)* |
| <b>RED and PROCESSED MEAT:</b> red meat (pork, beef, veal, etc.), sausages, bacon, reconstituted meat (sausages, meat loaf, hot-dogs, smoked sausages, bacon, etc.), high quality cured meats (ham, poultry and pork-beef good quality cold meats, etc.), offal products (liver, blood sausage, sweet-bread, liver pate, etc.), game (wild boar, venison, quail, mallard, hare, etc.)                                                                                                                          | 1.252 (1.151; 1.352)                     | 1.267  | Lower than median intake (times/day)*   |

\* Food frequency consumption was expressed as a times/day after assigning the values for categories of frequencies as follows: ‘never or almost never’ = 0; ‘once a month or less’ = 0.025; ‘several times a month’ = 0.1; ‘several times a week’ = 0.571; ‘daily’ = 1; ‘several times a day’ = 2; 95% CI – 95% confidence interval.

**Table S4.** Confounders in the case-control study regarding association of dietary fat intake with dietary patterns and breast cancer occurrence.

| Confounders                                                               | Categories                                 |
|---------------------------------------------------------------------------|--------------------------------------------|
| Age (years)                                                               | 40.0–49.9; 50.0–59.9; 60.0–69.9; 70.0–79.9 |
| BMI (kg/m <sup>2</sup> )<br>calculated using measured weight and height   | ≤24.9; 25.0–29.9; ≥30.0                    |
| Socioeconomic status (SES)<br>after combining data based on SES’ factors: | low; average; high                         |
| place of residence                                                        | village                                    |
|                                                                           | town <20,000 inhabitants                   |
|                                                                           | town 20,000–100,000 inhabitants            |
|                                                                           | city >100,000 inhabitants                  |
| educational level                                                         | primary                                    |

|                                                                                                                                  |                                                                                                    |                                                                                                                                     |
|----------------------------------------------------------------------------------------------------------------------------------|----------------------------------------------------------------------------------------------------|-------------------------------------------------------------------------------------------------------------------------------------|
|                                                                                                                                  | secondary                                                                                          |                                                                                                                                     |
|                                                                                                                                  | higher                                                                                             |                                                                                                                                     |
| economic situation<br>(self-declared)                                                                                            | below average                                                                                      |                                                                                                                                     |
|                                                                                                                                  | average                                                                                            |                                                                                                                                     |
|                                                                                                                                  | above average                                                                                      |                                                                                                                                     |
| situation of household (self-declared)                                                                                           | we live poorly – I don't have enough resources even for basic needs (food/clothing/housing fees)   |                                                                                                                                     |
|                                                                                                                                  | we live very thriftily – I have enough resources only for basic needs (food/clothing/housing fees) |                                                                                                                                     |
|                                                                                                                                  | we live thriftily – so I have enough resources for everything                                      |                                                                                                                                     |
|                                                                                                                                  | we live well – I have enough resources for everything, but I don't put off savings                 |                                                                                                                                     |
|                                                                                                                                  | we live very well – I have enough resources for everything and I put off savings                   |                                                                                                                                     |
| Menopausal status                                                                                                                | peri-, postmenopausal                                                                              |                                                                                                                                     |
| Age at menarche (years)                                                                                                          | <12.0; 12–14.9; ≥15.0                                                                              |                                                                                                                                     |
| Oral contraceptive use (ever)                                                                                                    | no; yes                                                                                            |                                                                                                                                     |
| Hormone-replacement therapy use                                                                                                  | no; yes                                                                                            |                                                                                                                                     |
| Number of full-term pregnancies                                                                                                  | 0; 1–2; ≥3                                                                                         |                                                                                                                                     |
| Overall physical activity<br>after combining data based<br>on physical activity at work<br>and physical activity in leisure time | low; moderate; high                                                                                |                                                                                                                                     |
| physical activity at work                                                                                                        | low                                                                                                | more than 70% of working time spent sedentary or retired                                                                            |
|                                                                                                                                  | moderate                                                                                           | approx. 50% of working time spent sedentary and 50% of working time spent in an active manner                                       |
|                                                                                                                                  | high                                                                                               | approx. 70% of working time spent in an active manner or physical work related to great exertion                                    |
| physical activity in leisure time                                                                                                | low                                                                                                | sedentary for most of the time, watching TV, reading books, walking 1–2 hours per week                                              |
|                                                                                                                                  | moderate                                                                                           | walking, bike riding, gymnastics, gardening, light physical activity performed 2–3 hours per week                                   |
|                                                                                                                                  | high                                                                                               | bike riding, jogging, gardening, sport activities involving physical exertion performed more than 3 hours weekly                    |
| Abuse of alcohol                                                                                                                 | no                                                                                                 |                                                                                                                                     |
|                                                                                                                                  | yes                                                                                                | intake at least 1 bottle (0.5 liters) of beer or 2 glasses of wine (300ml) or 2 drinks (300ml) or 2 glasses of vodka (60ml) per day |
| Smoking status                                                                                                                   | non-smoker                                                                                         |                                                                                                                                     |
|                                                                                                                                  | smoker                                                                                             | current-smoker or/ and former-smoker                                                                                                |
| Vitamin/mineral supplements use<br>(within last 12 months)                                                                       |                                                                                                    | no; yes                                                                                                                             |
| Family history of breast cancer in first-<br>or second-degree relatives                                                          |                                                                                                    | no; I don't know; yes                                                                                                               |
| Molecular of breast cancer subtypes                                                                                              |                                                                                                    | triple negative; ER-, PR-, HER2+ subtype; luminal A; luminal B                                                                      |

**Table S5.** The dietary fat intake in association with dietary patterns (% or mean (SD)).

| Variable                                 | Total sample | Energy from dietary fat (tertiles) |                    |                 | p-value |
|------------------------------------------|--------------|------------------------------------|--------------------|-----------------|---------|
|                                          |              | bottom<br>(<30%)                   | middle<br>(30–32%) | upper<br>(>32%) |         |
| Sample size                              | 420          | 139                                | 141                | 140             |         |
| Energy from dietary fat (%) <sup>#</sup> | 31.3 (3.3)   | 28.1 (1.5)                         | 31.1 (0.8)         | 34.9 (2.5)      | <0.0001 |
| Total fat intake (g) <sup>#</sup>        | 7.1 (4.3)    | 4.5 (3.4)                          | 6.8 (3.4)          | 9.9 (4.3)       | <0.0001 |

|                                                             |           |           |           |           |         |
|-------------------------------------------------------------|-----------|-----------|-----------|-----------|---------|
| <5                                                          | 35.2      | 56.1      | 36.2      | 13.6      |         |
| 5–8                                                         | 31.2      | 33.1      | 35.5      | 25.0      | <0.0001 |
| >8                                                          | 33.6      | 10.8      | 28.4      | 61.4      |         |
| Regular fat intake (g) <sup>#</sup>                         | 6.2 (4.2) | 3.4 (3.1) | 5.9 (3.2) | 9.3 (4.0) | <0.0001 |
| <5                                                          | 33.6      | 60.4      | 31.2      | 9.3       |         |
| 5–7                                                         | 33.3      | 32.4      | 44.0      | 23.6      | <0.0001 |
| >7                                                          | 33.1      | 7.2       | 24.8      | 67.1      |         |
| Dietary patterns                                            |           |           |           |           |         |
| ‘Non-Healthy’ score (points) <sup>#</sup>                   | 3.5 (1.8) | 2.6 (1.6) | 3.4 (1.6) | 4.6 (1.7) | <0.0001 |
| tertiles                                                    |           |           |           |           |         |
| bottom                                                      | 33.1      | 51.1      | 35.5      | 12.9      |         |
| middle                                                      | 33.6      | 30.9      | 39.7      | 30.0      | <0.0001 |
| upper                                                       | 33.3      | 18.0      | 24.8      | 57.1      |         |
| ‘Prudent’ score (points) <sup>#</sup>                       | 3.4 (1.2) | 3.7 (1.2) | 3.3 (1.3) | 3.3 (1.2) | 0.0086  |
| tertiles                                                    |           |           |           |           |         |
| bottom                                                      | 33.1      | 25.9      | 40.4      | 32.9      |         |
| middle                                                      | 33.3      | 34.5      | 29.1      | 36.4      | 0.0945  |
| upper                                                       | 33.6      | 39.6      | 30.5      | 30.7      |         |
| ‘Margarine and Sweetened Dairy’ score (points) <sup>#</sup> | 0.1 (1.0) | 0.1 (0.7) | 0.2 (1.0) | 0.0 (1.2) | 0.0380  |
| tertiles                                                    |           |           |           |           |         |
| bottom                                                      | 33.3      | 23.0      | 34.8      | 42.1      |         |
| middle                                                      | 33.1      | 45.3      | 29.8      | 24.3      | 0.0012  |
| upper                                                       | 33.6      | 31.7      | 35.5      | 33.6      |         |
| Polish-aMED® score (points) <sup>#</sup>                    | 4.7 (1.8) | 5.5 (1.5) | 4.7 (1.7) | 3.9 (1.7) | <0.0001 |
| lower (0–4 points)                                          | 45.0      | 25.2      | 46.1      | 63.6      |         |
| higher (5–8 points)                                         | 55.0      | 74.8      | 53.9      | 36.4      | <0.0001 |

Polish-aMED® – ‘Polish-adapted Mediterranean Diet’ (range of points: 0–8); the procedure of the total fat intake, regular fat intake and percentage of energy from dietary fat - calculation are given in the Materials and Methods section; % – sample percentage; <sup>#</sup>mean (SD); *p*-value – level of significance was assessed by chi<sup>2</sup> test (categorical variables) or Kruskal-Wallis’ test (continuous variables).

**Table S6.** The consumption of single foods and the assessment of fat content in the diet by the percentage energy from dietary fat status (% or mean (SD)).

| Variable                                              | Energy from dietary fat (%) |              |              | <i>p</i> -value |
|-------------------------------------------------------|-----------------------------|--------------|--------------|-----------------|
|                                                       | <30                         | 30–32        | >32          |                 |
| Sample Size                                           | 139                         | 141          | 140          |                 |
| Food consumption (g) <sup>#</sup>                     |                             |              |              |                 |
| Cold cereal                                           | 11.8 (15.2)                 | 6.9 (12.4)   | 4.8 (9.8)    | 0.0001          |
| Skim milk, on cereal or to drink                      | 19.5 (62.6)                 | 7.8 (22.6)   | 5.4 (17.6)   | 0.8024          |
| Orange juice or grapefruit juice                      | 91.0 (102.1)                | 50.2 (77.0)  | 43.9 (72.4)  | 0.0007          |
| Fruit (not juices)                                    | 134.9 (60.3)                | 113.2 (55.9) | 100.5 (52.4) | <0.0001         |
| Eggs, fried or scrambled in margarine, butter or oil  | 13.8 (14.4)                 | 14.3 (13.4)  | 18.9 (16.8)  | 0.0051          |
| Sausage or bacon, regular-fat                         | 1.8 (3.1)                   | 4.4 (5.4)    | 9.6 (8.8)    | <0.0001         |
| Beef or pork hot dogs, regular fat                    | 0.2 (0.8)                   | 0.6 (1.6)    | 1.7 (4.8)    | 0.0007          |
| Cheese or cheese spread, regular-fat                  | 6.1 (6.3)                   | 9.0 (7.1)    | 11.1 (9.2)   | <0.0001         |
| French fries, home fries, or hash brown potatoes      | 1.9 (3.8)                   | 2.2 (3.6)    | 4.5 (7.7)    | 0.0008          |
| Rice                                                  | 99.4 (52.9)                 | 85.0 (51.6)  | 85.5 (53.7)  | 0.0099          |
| Mayonnaise, regular-fat                               | 0.3 (0.6)                   | 0.4 (0.6)    | 1.0 (1.7)    | <0.0001         |
| Salad dressings, regular-fat                          | 0.5 (1.1)                   | 1.0 (1.7)    | 4.0 (9.8)    | <0.0001         |
| Margarine or butter on bread, rolls, pancakes         | 4.2 (3.3)                   | 6.2 (3.3)    | 8.7 (4.0)    | <0.0001         |
| Margarine or butter on vegetables, including potatoes | 0.1 (0.5)                   | 0.3 (0.8)    | 0.7 (1.2)    | <0.0001         |
| Margarine, butter, or oil on rice or pasta            | 0.1 (0.7)                   | 0.2 (0.6)    | 0.5 (1.4)    | 0.0008          |
| Frequency of reduced-fat margarine use                |                             |              |              |                 |
| didn’t use/almost never                               | 71.2                        | 78.0         | 85.7         |                 |
| about 1/4 of the time                                 | 6.5                         | 11.3         | 7.1          |                 |
| about 1/2 of the time                                 | 11.5                        | 6.4          | 5.7          | 0.0060          |

|                                                                                          |      |      |      |         |
|------------------------------------------------------------------------------------------|------|------|------|---------|
| about 3/4 of the time                                                                    | 6.5  | 3.5  | 1.4  |         |
| almost always or always                                                                  | 4.3  | 0.7  | 0.0  |         |
| Fat content in the diet (self-declared)                                                  |      |      |      |         |
| low                                                                                      | 28.8 | 20.6 | 15.7 |         |
| medium                                                                                   | 67.6 | 63.8 | 65.7 | 0.0006  |
| high                                                                                     | 3.6  | 15.6 | 18.6 |         |
| Comparison of fat content in the diet (objective vs subjective assessment)               |      |      |      |         |
| low vs low                                                                               |      |      |      |         |
| low vs average                                                                           | 28.8 | 3.5  | 0.0  |         |
| low vs high                                                                              | 0.0  | 17.0 | 15.7 |         |
| average vs average                                                                       | 67.6 | 7.1  | 0.0  |         |
| average vs low                                                                           |      |      |      | <0.0001 |
| average vs high                                                                          | 0.0  | 56.7 | 65.7 |         |
| high vs high                                                                             | 0.0  | 14.9 | 18.6 |         |
| high vs low                                                                              |      |      |      |         |
| high vs average                                                                          | 3.6  | 0.7  | 0.0  |         |
| Consistent assessment of comparison of fat content in the diet (objective vs subjective) | 67.6 | 22.0 | 18.6 | <0.0001 |

% – sample percentage; #mean (SD); *p*-value – level of significance assessed by chi<sup>2</sup> test (categorical variables) or Kruskal-Wallis' test (continuous variables).

**Table S7.** The consumption of single foods and the assessment of fat content in the diet by the by case-control status (% or mean (SD)).

| Variable                                                                   | Cancer-Control Sample | Cancer Sample | Control Sample | <i>p</i> -Value |
|----------------------------------------------------------------------------|-----------------------|---------------|----------------|-----------------|
| Sample Size                                                                | 420                   | 190           | 230            |                 |
| Food consumption (g) <sup>#</sup>                                          |                       |               |                |                 |
| Cold cereal                                                                | 7.8 (13.0)            | 5.8 (10.9)    | 9.5 (14.3)     | 0.0006          |
| Skim milk, on cereal or to drink                                           | 10.9 (40.0)           | 13.7 (47.0)   | 8.6 (33.1)     | 0.0098          |
| Orange juice or grapefruit juice                                           | 61.6 (87.1)           | 66.7 (91.9)   | 57.3 (82.9)    | 0.9011          |
| Fruit (not juices)                                                         | 116.2 (57.9)          | 113.4 (58.7)  | 118.4 (57.3)   | 0.1166          |
| Eggs, fried or scrambled in margarine, butter or oil                       | 15.7 (15.1)           | 17.4 (16.0)   | 14.2 (14.2)    | 0.0743          |
| Sausage or bacon, regular-fat                                              | 5.3 (7.0)             | 5.6 (6.8)     | 5.0 (7.2)      | 0.0341          |
| Beef or pork hot dogs, regular fat                                         | 0.8 (3.0)             | 1.3 (4.0)     | 0.4 (1.9)      | 0.0021          |
| Cheese or cheese spread, regular-fat                                       | 8.7 (7.9)             | 8.1 (6.6)     | 9.2 (8.8)      | 0.7077          |
| French fries, home fries, or hash brown potatoes                           | 2.8 (5.5)             | 3.5 (6.3)     | 2.3 (4.7)      | 0.0031          |
| Rice                                                                       | 90.0 (53.0)           | 94.0 (52.9)   | 86.6 (53.1)    | 0.0741          |
| Mayonnaise, regular-fat                                                    | 0.6 (1.1)             | 0.7 (1.3)     | 0.5 (0.9)      | 0.1018          |
| Salad dressings, regular-fat                                               | 1.8 (5.9)             | 2.8 (8.3)     | 1.1 (2.6)      | 0.0584          |
| Margarine or butter on bread, rolls, pancakes                              | 6.4 (4.0)             | 7.0 (4.3)     | 5.8 (3.6)      | 0.0046          |
| Margarine or butter on vegetables, including potatoes                      | 0.4 (0.9)             | 0.5 (1.0)     | 0.3 (0.8)      | 0.2876          |
| Margarine, butter, or oil on rice or pasta                                 | 0.3 (1.0)             | 0.4 (1.0)     | 0.2 (0.9)      | 0.0170          |
| Frequency of reduced-fat margarine use                                     |                       |               |                |                 |
| didn't use/almost never                                                    | 78.3                  | 73.7          | 82.2           |                 |
| about 1/4 of the time                                                      | 8.3                   | 11.6          | 5.7            |                 |
| about 1/2 of the time                                                      | 7.9                   | 10.0          | 6.1            | 0.0602          |
| about 3/4 of the time                                                      | 3.8                   | 2.6           | 4.8            |                 |
| almost always or always                                                    | 1.7                   | 2.1           | 1.3            |                 |
| Fat content in the diet (self-declared)                                    |                       |               |                |                 |
| low                                                                        | 21.7                  | 14.7          | 27.4           |                 |
| medium                                                                     | 65.7                  | 67.4          | 64.3           | <0.001          |
| high                                                                       | 12.6                  | 17.9          | 8.3            |                 |
| Comparison of fat content in the diet (objective vs subjective assessment) |                       |               |                |                 |
| low vs low                                                                 |                       |               |                |                 |
| low vs average                                                             | 10.7                  | 6.8           | 13.9           |                 |
| low vs high                                                                | 11.0                  | 7.9           | 13.5           |                 |
| average vs average                                                         | 24.8                  | 20.5          | 28.3           |                 |
| average vs low                                                             |                       |               |                | <0.001          |

|                                                                                          |      |      |      |        |
|------------------------------------------------------------------------------------------|------|------|------|--------|
| average vs high                                                                          | 41.0 | 46.8 | 36.1 |        |
| high vs high                                                                             | 11.2 | 15.8 | 7.4  |        |
| high vs low                                                                              |      |      |      |        |
| high vs average                                                                          | 1.4  | 2.1  | 0.9  |        |
| Consistent assessment of comparison of fat content in the diet (objective vs subjective) | 36.0 | 36.3 | 35.7 | 0.8878 |

% – sample percentage; <sup>a</sup>mean (SD); *p*-value – level of significance assessed by chi<sup>2</sup> test (categorical variables) or Kruskal-Wallis' test (continuous variables).
